# Supplementary material for: A study on the catalytic oxidation of soot by Sn–Ce composite oxides: adsorbed oxygen and defect sites synergistically enhance catalytic activity
Source: Royal Society of Chemistry journal article supplement (doi:10.1039/c9nj04134f), 2019-01-01
Supplement: c9nj04134f1.pdf [file c9nj04134f1.pdf]

**Fig. S1** N<sub>2</sub> adsorption-desorption analysis of Sn-Ce catalysts.

**Fig. S2** Pore size distribution.

**Fig. S3** TPO profiles on different ratio catalysts under tight contact (without water).

**Fig. S4** TPO profiles on different ratio catalysts under loose contact (without water).

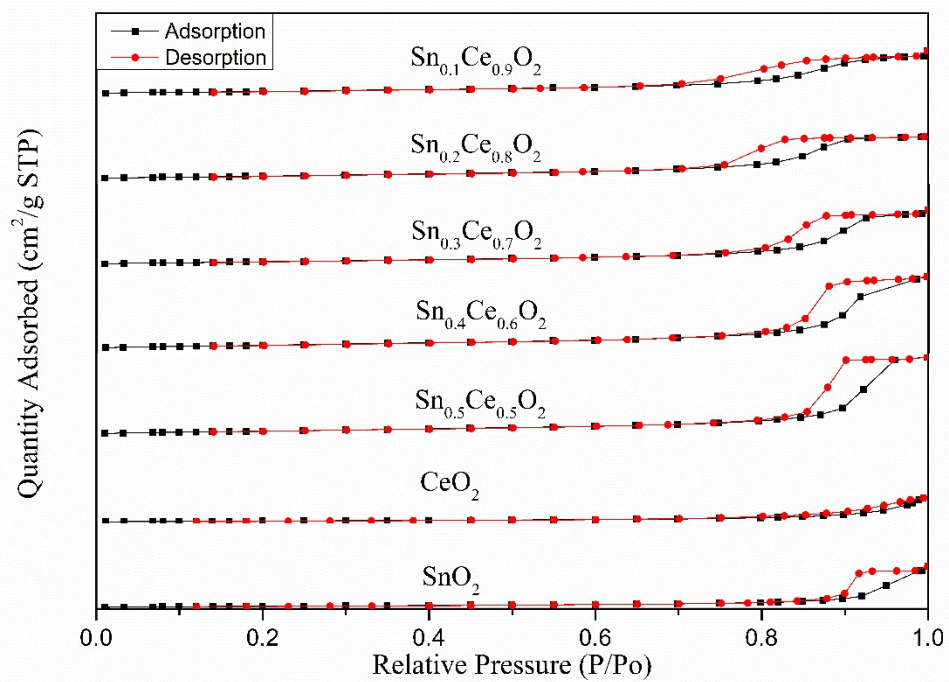

**Fig. S1**

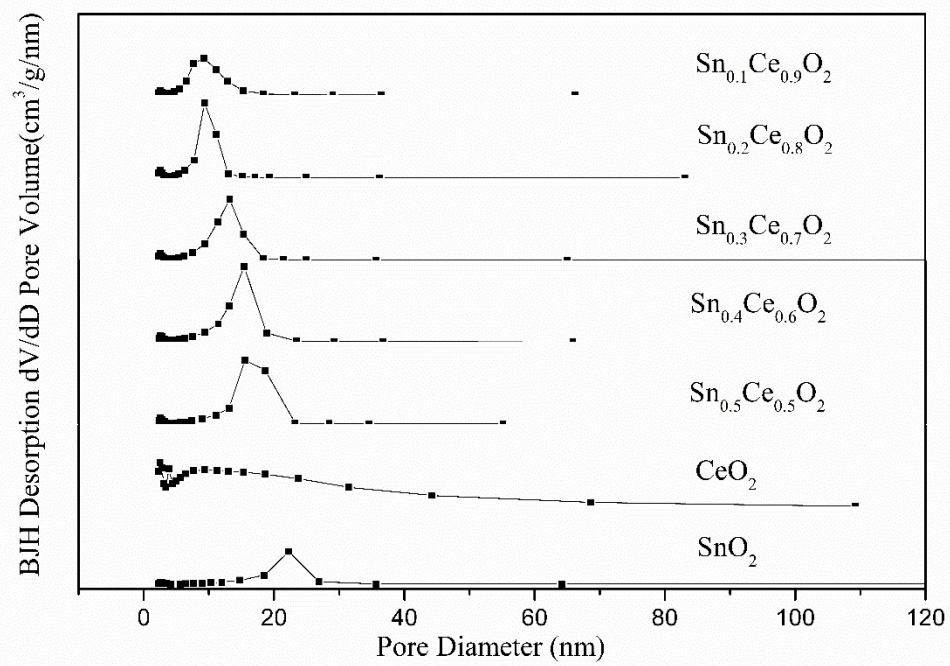

**Fig. S2**

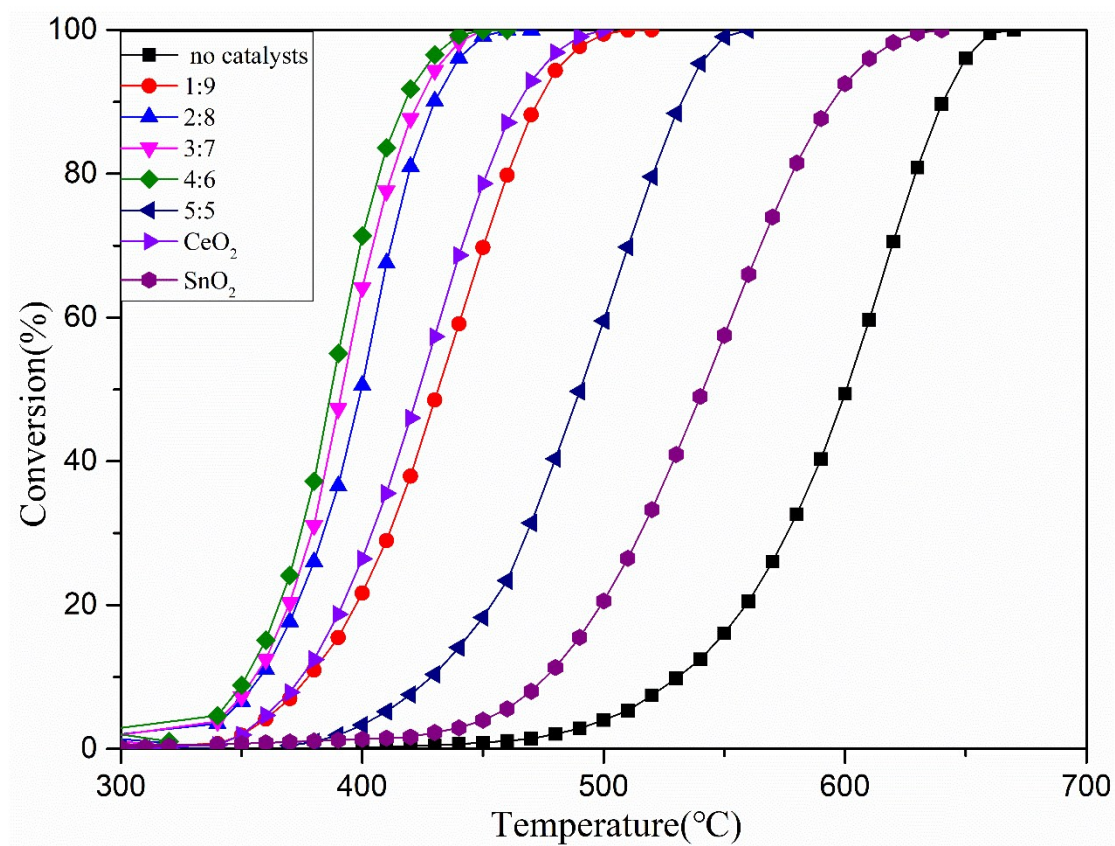

Fig. S3

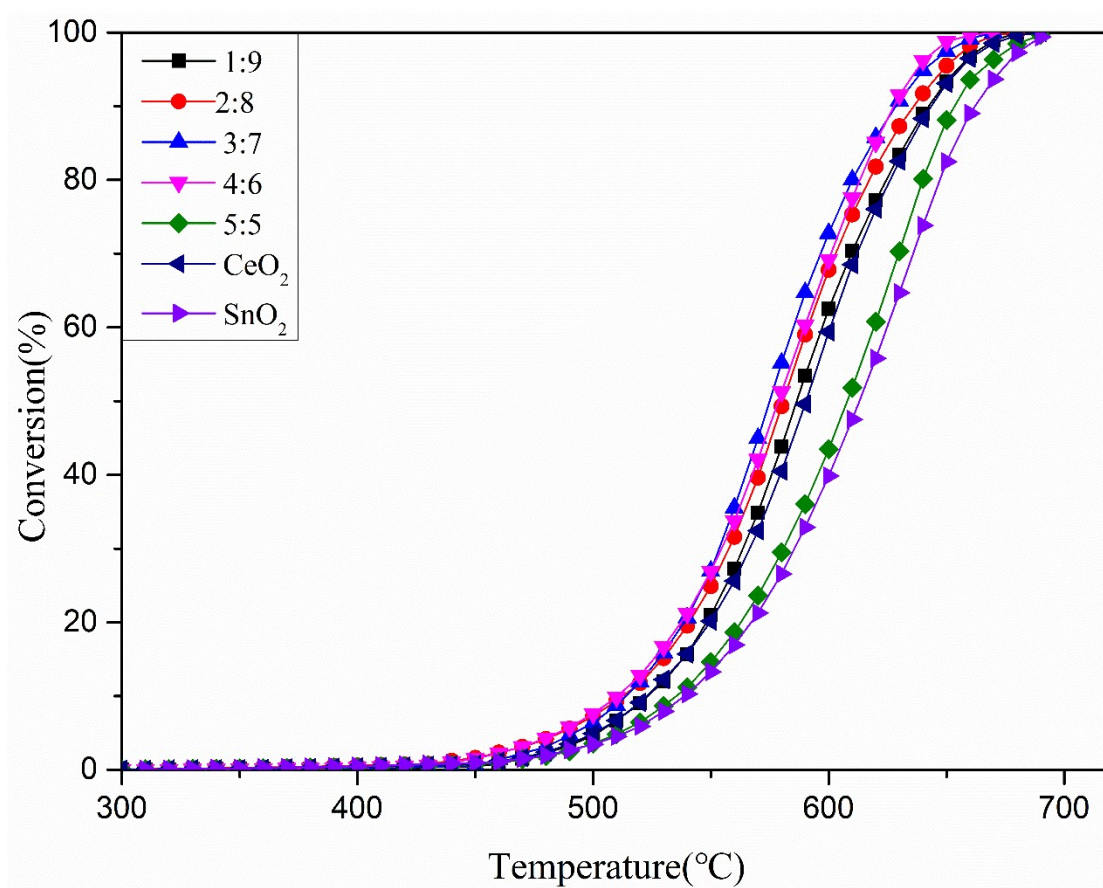

Fig. S4
